# Supplementary material for: Genotype-Phenotype Correlation in Patients With Germline Mutations of VHL, RET, SDHB, and SDHD Genes: Thai Experience
Source: PubMed Central journal article supplement — Clin Med Insights Endocrinol Diabetes. 2017 Apr 20;10:1179551417705122. doi: 10.1177/1179551417705122 (PMC5404897; doi:10.1177/1179551417705122), 2017-04-20
Supplement: Supplemental_Data_705122.pdf [file Supplemental_Data_705122.pdf]

## Supplemental Data

### DNA analysis

Genomic DNA was extracted from buffy coat leukocytes using the standard phenol-chloroform method. PCR primers were designed to amplify the entire coding sequence plus flanking splice sites using the Primer-3-web-based tool.

#### 1. von Hippel–Lindau (VHL) disease: *VHL* gene

A 25- $\mu$ L PCR mixture contained 100 ng of genomic DNA, 0.4  $\mu$ M of each primer, 0.1 mM of each dNTP, 0.5 unit of Taq DNA polymerase (Invitrogen<sup>®</sup>, Carlsbad, CA, United States), 2.5 mM MgCl<sub>2</sub> in 10X PCR buffer. PCR reaction was started with an initial denaturation at 94°C for 3 min, followed by 35 cycles of amplification in a thermocycler (PCR Sprint, Thermofisher, Waltham, MA, United States) with denaturation at 94°C for 1 min, annealing at 63°C for 1 min, extension at 72°C for 1 min, and final extension at 72°C for 10 min.

---

| Exon | Forward primer          | Reverse primer           |
|------|-------------------------|--------------------------|
| 1    | TACAACGGCCTACGGTGCT     | GGCTTCAGACCGTGCTATCG     |
| 2    | ACCGGTGTGGCTCTTTAACAACC | TCAAGTGGTCTATCCTGTACTTAC |
| 3    | GAGATCCATCAGTAGTACAGG   | AAAGCTGAGATGAAACAGTGTAAG |

---

#### 2. Multiple endocrine neoplasia type 2 (MEN2): *RET* gene

A 25- $\mu$ L PCR mixture contained 100 ng of genomic DNA, 0.4  $\mu$ M of each primer, 0.1 mM of each dNTP, 0.5 unit of Taq DNA polymerase (Invitrogen<sup>®</sup>, Carlsbad, CA, United States), 2.5 mM MgCl<sub>2</sub> in 10X PCR buffer. PCR reaction was started with an initial denaturation at 94°C for 3 min, followed by 35 cycles of amplification in a thermocycler (PCR Sprint, Thermofisher, Waltham, MA, United States) with denaturation at 94°C for 1 min, annealing at various temperatures (below) for 1 min, extension at 72°C for 1 min, and final extension at 72°C for 10 min.

| Exon | Forward primer        | Reverse primer       | Annealing temperature (°C) |
|------|-----------------------|----------------------|----------------------------|
| 10   | AGGCTGAGTGGGCTACGTCT  | TGCTGTTGAGACCTCTGTGG | 63                         |
| 11   | CAGAGCATAACGCAGCCTGTA | CTATGGAAATGGGGGCAGA  | 63                         |
| 12   | GTCATGTAGCAGCTTTCAGG  | AAAGTCCTCGCTCTGCTTCT | 63                         |
| 13   | TCAAGCAGCATCGTCTTTGC  | ATGGAAAGTGACCACTCAGC | 63                         |
| 14   | CAAGAGAAAGCTGAGGCTTC  | AAATAGCACGAGTCGTCAGG | 63                         |
| 15   | CCTGACGACTCGTGCTATTT  | CTTCGGTATCTTTCCTAGGC | 63                         |
| 16   | TGTCTACAGCACTCCTCTG   | CCCCACTACATGTATAAGGG | 63                         |

### 3. Familial Paraganglioma: Succinate dehydrogenase complex, subunit B (*SDHB*) gene

A 25- $\mu$ L PCR mixture contained 100 ng of genomic DNA, 0.4  $\mu$ M of each primer, 0.1 mM of each dNTP, 0.5 unit of Taq DNA polymerase (Invitrogen<sup>®</sup>, Carlsbad, CA, United States), 2.5 mM MgCl<sub>2</sub> in 10X PCR buffer. PCR reaction was started with an initial denaturation at 94°C for 3 min, followed by 35 cycles of amplification in a thermocycler (PCR Sprint, Thermofisher, Waltham, MA, United States) with denaturation at 94°C for 25 seconds, annealing at various temperatures (below) for 25 seconds, extension at 72°C for 45 seconds, and final extension at 72°C for 5 min.

| Exon | Forward primer       | Reverse primer        | Annealing temperature (°C) |
|------|----------------------|-----------------------|----------------------------|
| 1    | CCTGTAATCCCAGCTACTCG | TTGCCCTATGCTTCCTCAGT  | 62                         |
| 2    | GTGTGAGTTTATATCCAGCG | CTTCCAAGGATGTGAAAAGC  | 64                         |
| 3    | ACCTGAGAAGACCAAATGGA | GTCTCTATCAGCTTTGGCCA  | 64                         |
| 4    | TCCAGAAGAAAGTATTTGGG | ATAGCGTAACACACATAGCAC | 64                         |
| 5    | AGTCAGTGTCCAAGAAATGG | TGGCTTGCATCAGCTTATGT  | 64                         |

|   |                       |                       |    |
|---|-----------------------|-----------------------|----|
| 6 | AGGCACTTTGTTTCATGCACT | CTATTGTCCTCTTGGACTTC  | 64 |
| 7 | CTCCCAGAGCTTTGAGTTGA  | CTCTCTGCCAATCACCTCTT  | 64 |
| 8 | ACCAGCTGAGGAAGGAGTTT  | CCAAGATCTTTAAAGGAACTC | 62 |

#### 4. Familial Paraganglioma: Succinate dehydrogenase complex, subunit D (SDHD) gene

A 25- $\mu$ L PCR mixture contained 100 ng of genomic DNA, 0.4  $\mu$ M of each primer, 0.1 mM of each dNTP, 0.5 unit of Taq DNA polymerase (Invitrogen®, Carlsbad, CA, United States), 2.5 mM MgCl<sub>2</sub> in 10X PCR buffer. PCR reaction was started with an initial denaturation at 94°C for 3 min, followed by 35 cycles of amplification in a thermocycler (PCR Sprint, Thermofisher, Waltham, MA, United States) with denaturation at 94°C for 25 seconds, annealing at various temperatures (below) for 25 seconds, extension at 72°C for 45 seconds, and final extension at 72°C for 5 min.

| Exon | Forward primer       | Reverse primer        | Annealing temperature (°C) |
|------|----------------------|-----------------------|----------------------------|
| 1    | GTATCTTTTCTACGGGCACG | GACTACAGTGGTCATTGCTGT | 62                         |
| 2    | ACTTCACAGTAACCCCAGTG | AAGTTGGACACAAGAGTCCC  | 64                         |
| 3    | GGGTTACTGTGTGGCATATG | TACATAAGACAAGCTCACAGC | 64                         |
| 4    | GAAGCAAACAGTGACAGTGG | TTAAGAGAAGAAGGCTGTCC  | 64                         |
